# Supplementary material for: Selenoprotein P Concentrations in the Cerebrospinal Fluid and Serum of Individuals Affected by Amyotrophic Lateral Sclerosis, Mild Cognitive Impairment and Alzheimer’s Dementia
Source: MDPI journal article supplement (doi:10.3390/ijms23179865), 2022-08-30
Supplement: s1 [file s1]

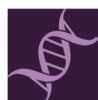

## Supplemental Material

**Table S1.** Characteristics of the study population along with median and interquartile range (IQR) levels of selenoprotein P levels in cerebrospinal fluid (CSF) and serum according to sex, age, and education categories.

| Characteristics                      | N   | %    | CSF (n=164)<br>Selenoprotein P | Serum (n=153)<br>Selenoprotein P |
|--------------------------------------|-----|------|--------------------------------|----------------------------------|
|                                      |     |      | 50 <sup>th</sup> (IQR)         | 50 <sup>th</sup> (IQR)           |
| All participants                     | 164 | 100  | 22.8<br>(15.3–32.9)            | 6364.6<br>(5670.3–6998.0)        |
| <i>Sex</i>                           |     |      |                                |                                  |
| Men                                  | 87  | 53.0 | 26.1<br>(15.3–35.8)            | 6533.5<br>(5804.9–7126.3)        |
| Women                                | 77  | 47.0 | 22.1<br>(15.3–31.7)            | 6182.2<br>(5652.3–6952.1)        |
| <i>Age (years)</i>                   |     |      |                                |                                  |
| < 65                                 | 84  | 51.2 | 22.8<br>(14.3–32.3)            | 6190.0<br>(5709.6–6989.2)        |
| ≥ 65                                 | 80  | 48.8 | 23.2<br>(16.9–33.3)            | 6528.2<br>(5595.6–7001.3)        |
| <i>Education (years)<sup>‡</sup></i> |     |      |                                |                                  |
| < 8                                  | 39  | 32.2 | 28.3<br>(20.6–33.0)            | 6630.3<br>(5766.6–7339.4)        |
| ≥ 8 and ≤ 12                         | 40  | 33.1 | 23.1<br>(13.7–37.0)            | 6364.6<br>(5800.5–7136.4)        |
| ≥ 13                                 | 42  | 34.7 | 22.6<br>(14.3–33.8)            | 6558.8<br>(5703.4–6984.6)        |

<sup>‡</sup> Education information missing for 43 subjects (1 Alzheimer's dementia, 20 healthy controls, 22 amyotrophic lateral sclerosis).
